# Supplementary material for: Design of a redox-active “water-in-salt” hydrogel polymer electrolyte for superior-performance quasi-solid-state supercapacitors
Source: Royal Society of Chemistry journal article supplement (doi:10.1039/d0nj04102e), 2020-01-01
Supplement: d0nj04102e1.pdf [file d0nj04102e1.pdf]

## **Supporting Information**

### **Design of A Redox-Active “Water-in-Salt” Hydrogel Polymer Electrolyte for Superior-Performance Quasi-Solid-State Supercapacitors**

Le-Qing Fan,<sup>\*ab</sup> Cheng-Long Geng,<sup>ab</sup> Yong-Lan Wang,<sup>ab</sup> Si-Jia Sun,<sup>ab</sup> Yun-Fang Huang,<sup>b</sup> and Ji-Huai Wu<sup>\*ab</sup>

<sup>a</sup> Fujian Key Laboratory of Photoelectric Functional Materials, College of Materials Science and Engineering, Huaqiao University, Xiamen, Fujian 361021, China

<sup>b</sup> Engineering Research Center of Environment-Friendly Functional Materials, Ministry of Education, Xiamen, Fujian 361021, China

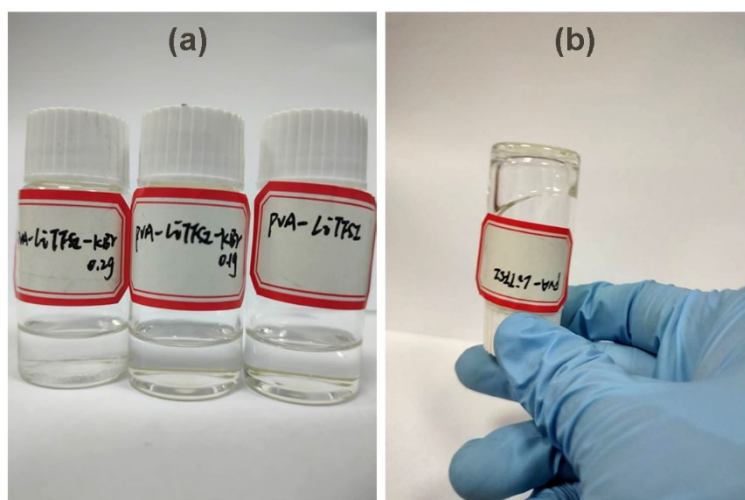

**Fig. S1** Digital photos of (a) PVA-LiTFSI HPE and PVA-LiTFSI-KBr HPEs containing different masses of KBr (0.1 and 0.2 g), and (b) the PVA-LiTFSI HPE in the bottle upside down.

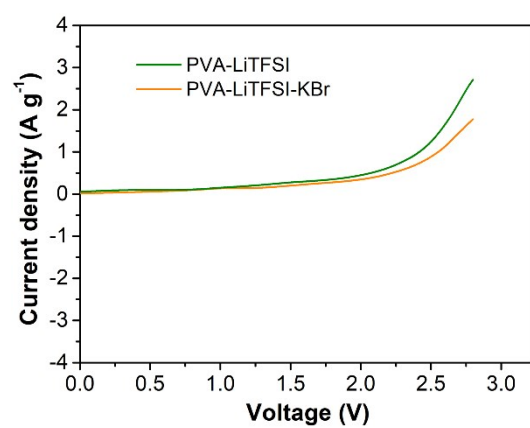

**Fig. S2** LSV curves of SCs with PVA-LiTFSI and PVA-LiTFSI-KBr HPEs.

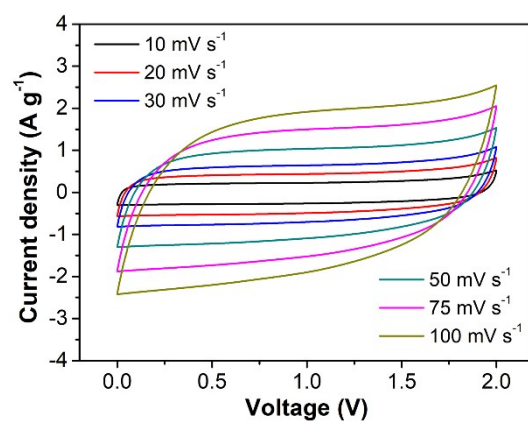

**Fig. S3** CV curves of the SC with a PVA-LiTFSI HPE at different scan rates.
